# Supplementary material for: Alkaline O2 reduction on oxide-derived Au: high activity and 4e− selectivity without (100) facets
Source: Royal Society of Chemistry journal article supplement (doi:10.1039/c4cp01337a), 2014-01-01
Supplement: c4cp01337a1.pdf [file c4cp01337a1.pdf]

Supplementary Information for

**Alkaline O<sub>2</sub> Reduction on Oxide-Derived Au:  
High Activity and 4e<sup>-</sup> Selectivity without (100) Facets**

Xiaoquan Min, Yihong Chen, and Matthew W. Kanan\*

\*Correspondence to: [mkanan@stanford.edu](mailto:mkanan@stanford.edu)

**This PDF file includes:**

Materials and Methods  
Figures S1 and S2  
Tables S1 and S2

## Materials and Methods

### Materials

Gold foil (thickness 0.1 mm, 99.99%), gold wire (diam. 0.25 mm, 99.9%), gold(III) chloride trihydrate ( $\geq 99.9\%$ ), sodium borohydride ( $\geq 98.0\%$ ), cetyltrimethylammonium chloride (25 wt.% in H<sub>2</sub>O), sodium bromide ( $\geq 99.5\%$ ), KI ( $\geq 99.5\%$ ), L-ascorbic acid ( $\geq 99.0\%$ ), potassium hydroxide (99.99%), Pt gauze (99.9%), Pt wire (99.9%), Na<sub>2</sub>CO<sub>3</sub> (99.9999%, TraceSELECT<sup>®</sup>), and H<sub>2</sub>SO<sub>4</sub> ( $\geq 95\%$ , TraceSELECT<sup>®</sup>) were purchased from Sigma-Aldrich; gold disk (thickness 4 mm, diam. 5 mm, 99.99%) was purchased from Pine Research Instrumentation Inc.; oxygen (99.99%), and carbon dioxide (99.99%) was purchased from Praxair. Gold foil and wire were etched in fresh aqua regia for  $\sim 20$  s, and then rinsed with deionized water thoroughly prior to experiments. All other chemicals were used without further purification. Electrolyte solutions were prepared with deionized water (Ricca Chemical, ASTM Type I). NaHCO<sub>3</sub> solution was prepared by vigorously bubbling CO<sub>2</sub> gas through Na<sub>2</sub>CO<sub>3</sub> solutions.

### Preparation of OD-Au on Gold Foil and Gold Disk

A piece of gold foil ( $\sim 0.5$  cm<sup>2</sup>) was immersed in aqueous 0.5 M H<sub>2</sub>SO<sub>4</sub> solution in an one-compartment electrochemical cell with a platinum gauze auxiliary electrode and a Hg/Hg<sub>2</sub>SO<sub>4</sub> reference electrode (0.50 M H<sub>2</sub>SO<sub>4</sub>, CH Instruments). Symmetric 1 kHz square-wave pulses between 2.70 V and 0.70 V were applied for 5 min (300,000 cycles) with the use of a Gamry Reference 600 Potentiostat. After pulsed anodization, the foil was rinsed very gently with deionized water to remove remaining H<sub>2</sub>SO<sub>4</sub> from the as-grown oxide layer. Then the foil was immersed in CO<sub>2</sub>-saturated NaHCO<sub>3</sub> solution and held at  $-1.03$  V vs Ag/AgCl reference electrode (3.0 M KCl, World Precision Instruments) for 5 min to fully reduce the gold oxide layer. The preparation of OD-Au on Au disk was the same as above except that a gold disk was used.

### Syntheses of Shaped Au Nanoparticles (NPs)

The procedure was adapted from a two-step, seed-mediated method established in literature (refs 8 and 9 in the main text). The Au seed solution was prepared by injecting 0.45 mL of 0.02 M freshly prepared, ice-cooled NaBH<sub>4</sub> solution into 10 mL solution containing 0.25 mM HAuCl<sub>4</sub> and 0.1 M cetyltrimethylammonium chloride (CTAC) while stirring. The resulting solution was left undisturbed for 2 h to allow complete decomposition of excess NaBH<sub>4</sub>.

Growth solution I and growth solution II were prepared with a different recipe for each type of polyhedral nanoparticles. Growth solution I was prepared by adding 0.01 mL of 0.01 M NaBr and 0.09 mL of 0.04 M ascorbic acid (cubes), or 0.01 mL of 0.01 M NaBr and 0.15 mL of 0.04 M ascorbic acid (dodecahedra), or 0.01 mL of 0.001 M KI and 0.22 mL of 0.04 M ascorbic acid (octahedra) into 10 mL of 0.25 mM HAuCl<sub>4</sub> and 0.1 M CTAC. Growth solution II was prepared with the same concentration as growth solution I but 20-fold higher volume. 0.025 mL Au seed solution was injected into the growth solution I while stirring. After  $\sim 20$  s, 0.5 mL of the resulting pink solution from growth solution I was injected into growth solution II. After stirring for 1 min, the solution was left undisturbed for 2 h for growth. The nanoparticles were centrifuged and washed repeatedly with DI water. After washing, the nanoparticles were re-dispersed to  $\sim 2$  mg/mL in DI water for electrode preparation experiments.

## Electrochemical Measurements

A CH Instruments 760D Potentiostat or a Gamry Reference 600 Potentiostat was used for all oxygen reduction experiments. Experiments were performed at room temperature (20 °C). A piece of platinum gauze was used as the auxiliary electrode. All potentials were measured against an Hg/Hg<sub>2</sub>Cl<sub>2</sub> reference electrode (satd. KCl, CH Instruments) or Ag/AgCl reference electrode (3.0 M KCl) and converted to the RHE reference scale using  $E$  (vs RHE) =  $E$  (vs Hg/Hg<sub>2</sub>Cl<sub>2</sub>) + 0.241 V + 0.0591 V × pH or  $E$  (vs RHE) =  $E$  (vs Ag/AgCl) + 0.21 V + 0.0591 V × pH.

For shaped Au NPs, the suspension was mixed with ~10 wt.% Nafion and 0.020 mL of the catalyst ink was drop-dried onto the glassy-carbon rotating disk electrode for electrochemical experiments.

## Electrochemical Surface Area (ECSA) Measurement

The electrochemical surface area of the ODAu and shaped Au nanoparticle electrodes were determined by measuring the desorption charge associated with the stripping of the underpotential deposited Cu monolayer on Au (**Figure S2**). The experiments were conducted in 0.50 M H<sub>2</sub>SO<sub>4</sub> solution with a piece of Pt gauze as the counter electrode and an Hg/Hg<sub>2</sub>SO<sub>4</sub> electrode (0.50 M H<sub>2</sub>SO<sub>4</sub>, CH Instruments) as the reference electrode. The desorption peaks at ~ -0.1 V were integrated.

## Pb-underpotential deposition (Pb-upd) Measurement

The Pb-upd measurements of ODAu and shaped Au nanoparticles were conducted in 0.1 M NaOH solution containing 1 mM Pb(OAc)<sub>2</sub> with a piece of Pt gauze as the counter electrode and an Ag/AgCl electrode (3.0 M KCl, World Precision Instruments) as the reference electrode. The scan rate was 50 mV/s.

## Koutechy-Levich Kinetics and Determination of $n$ Values

Koutecky-Levich Equation:  $j^{-1} = j_k^{-1} + j_d^{-1}$

$j$ : current density, A·cm<sup>-2</sup>

$j_k$ : kinetic current density, A·cm<sup>-2</sup>

$j_d = 0.62nFD_0^{2/3}v^{-1/6}C_0\omega^{1/2}$ , diffusion-limited current density, A·cm<sup>-2</sup>

$F$ : Faraday's Constant, 96485 C·mol<sup>-1</sup>

$D_0$ : diffusion coefficient of O<sub>2</sub> in 0.1 M KOH (1.93×10<sup>-5</sup> cm<sup>2</sup>·s<sup>-1</sup>)<sup>[1],[2]</sup>

$v$ : kinematic viscosity of the electrolyte, 0.1 M KOH, (1.09×10<sup>-2</sup> cm<sup>2</sup>·s<sup>-1</sup>)<sup>[1],[2]</sup>

$C_0$ : saturation concentration of O<sub>2</sub> in 0.1 M KOH at 1 atm O<sub>2</sub> pressure, (1.26×10<sup>-6</sup> mol·cm<sup>-3</sup>)<sup>[1],[2]</sup>

$\omega$ : rotation rate, rad·s<sup>-1</sup>

$0.62FD_0^{2/3}v^{-1/6}C_0 = 1.152 \times 10^{-4} \text{ A} \cdot \text{cm}^{-2} \cdot \text{s}^{1/2} \cdot \text{rad}^{-1/2}$

Taking 0.8 V as an example, the linear fitting of the plot of  $j^{-1}$  vs  $\omega^{-1/2}$  has a slope of 2195 A<sup>-1</sup>·cm<sup>2</sup>·s<sup>-1/2</sup>·rad<sup>1/2</sup>, which corresponds to  $n = 3.95$ .

Calculations of  $n$  in the literature often use the  $B$  factor, which is the slope of the  $i^{-1}$  vs  $\omega^{-1/2}$  plot when  $i$  is the current in units of mA and  $\omega$  is the rotation rate in units of rpm. In this treatment,  $B = 0.62nFD_0^{2/3}v^{-1/6}C_0S_{\text{geo}}(2\pi/60)^{1/2}$ , where  $S_{\text{geo}} = 0.196 \text{ cm}^2$  is the geometric area of the electrode used in our experiments. For a 4e<sup>-</sup> reduction of O<sub>2</sub> in 0.1 M KOH with these electrodes, the theoretical value of  $B = 2.92 \times 10^{-2} \text{ mA} \cdot \text{rpm}^{-0.5}$ . Taking 0.8 V as an example, the linear fitting of the plot of  $i^{-1}$  vs  $\omega^{-1/2}$  gives a slope of 3.46×10<sup>4</sup> A<sup>-1</sup>·rpm<sup>0.5</sup>; therefore, the experimental value of  $B$  is 2.89×10<sup>-2</sup> mA·rpm<sup>-0.5</sup>, which corresponds to  $n = 3.96$ .

[1] Blizanac, B.B.; Ross, P.N.; Markovic, N.M. *J Phys Chem B* **2006**, *110*, 4735.

[2] Singh, P.; Buttry, D.A. *J Phys Chem C* **2012**, *116*, 10656.

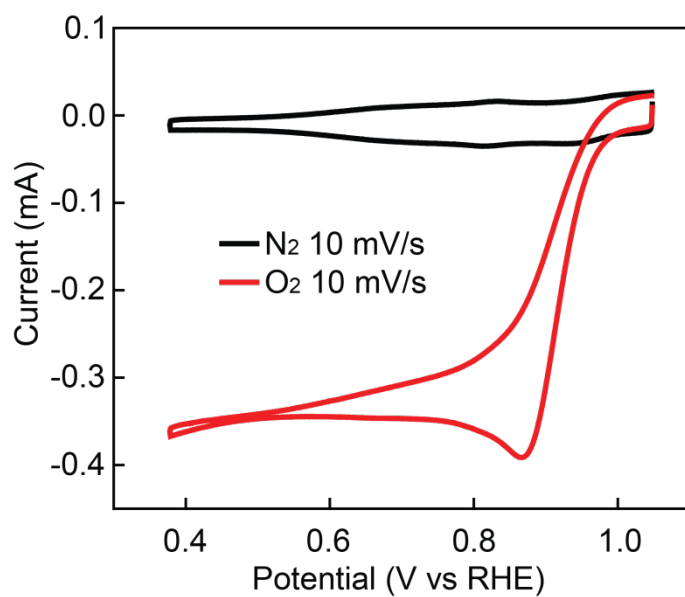

**Figure S1**

Cyclic voltammograms (CVs) of OD-Au in N<sub>2</sub>-, and O<sub>2</sub>-saturated 0.1 M KOH with a scan rate of 10 mV/s.

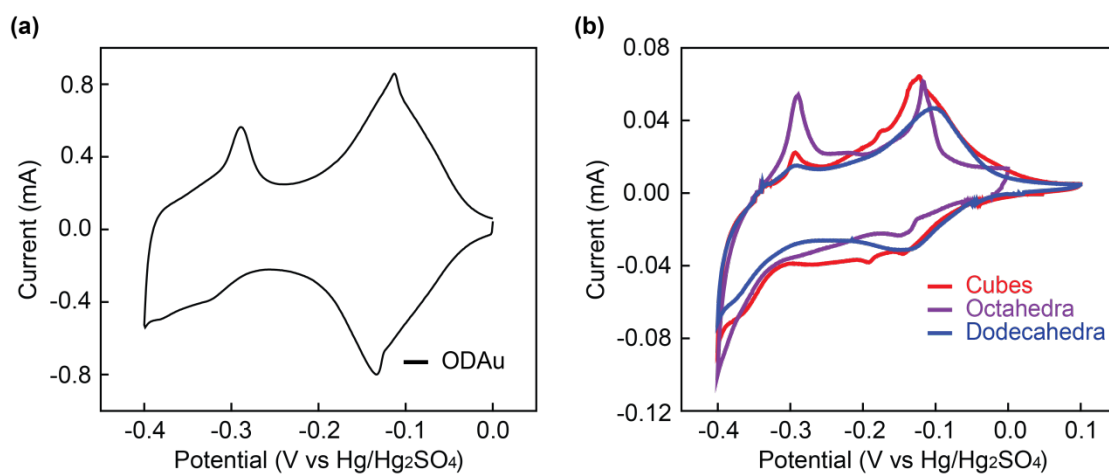

**Figure S2**

Electrochemical surface area (ECSA) measurements of OD-Au and shaped Au NP electrodes using Cu-upd method. Scan rate: 50 mV/s.

|                  | OD-Au | Au Cubes | Au Octahedra | Au Dodecahedra |
|------------------|-------|----------|--------------|----------------|
| Roughness Factor | 47.7  | 4.3      | 1.2          | 2.9            |

**Table S1**

Roughness factor comparison between OD-Au and shaped Au nanoparticles

| Potential V vs RHE | <i>n</i> |
|--------------------|----------|
| 0.8                | 3.95     |
| 0.75               | 3.88     |
| 0.7                | 3.84     |
| 0.65               | 3.84     |
| 0.6                | 3.78     |
| 0.55               | 3.74     |
| 0.5                | 3.69     |
| 0.45               | 3.69     |

**Table S2**

*n*-values of OD-Au at different potentials determined from the slopes of the Koutecky-Levich plots.
